# Supplementary material
Source: PubMed Central journal article supplement (PMC3164126)
Supplement: mmc1.pdf [file mmc1.pdf]

## Effects of zinc on beta amyloid dynamics

Nasrollah Rezaei-Ghaleh, Karin Giller, Stefan Becker, and Markus Zweckstetter

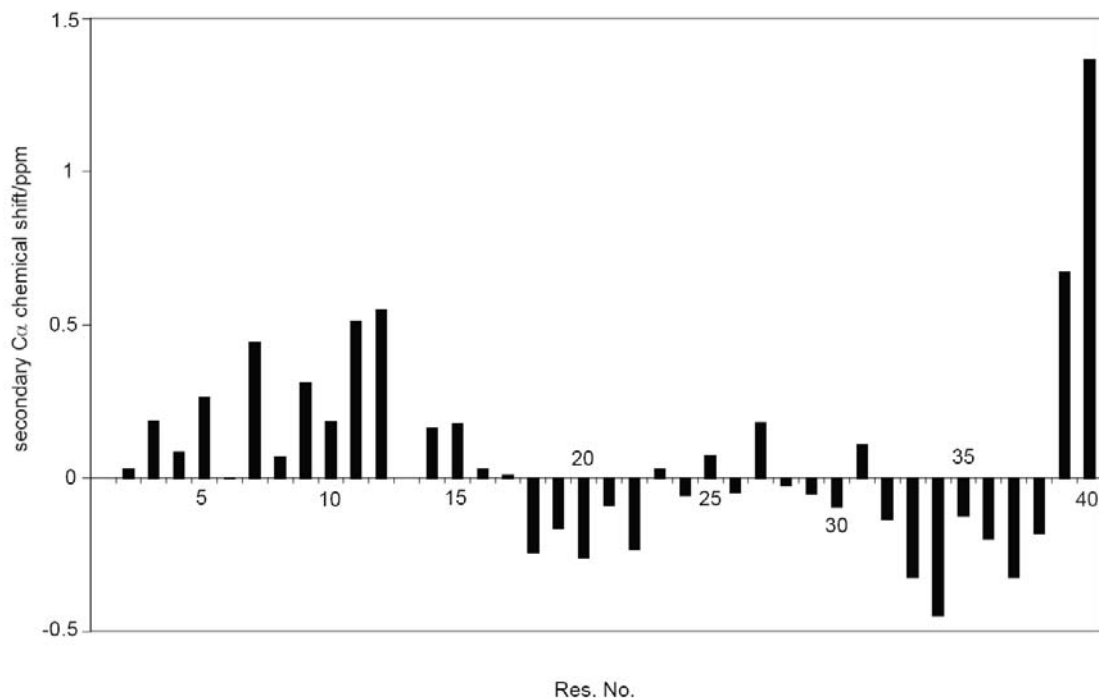

**Fig S1.** Secondary carbon alpha ( $C\alpha$ ) chemical shifts of  $A\beta_{40}$  in the zinc-free form. Residues 18-22 and Gly29 toward C-terminus reveal a tendency for an extended conformation, while the intervening residues of 23-28 adopt a less extended conformation. The random coil values were predicted by CamCoil (De Simone et al., 2009) using a pH of 6.1, and average values over a window of three residues are shown here.

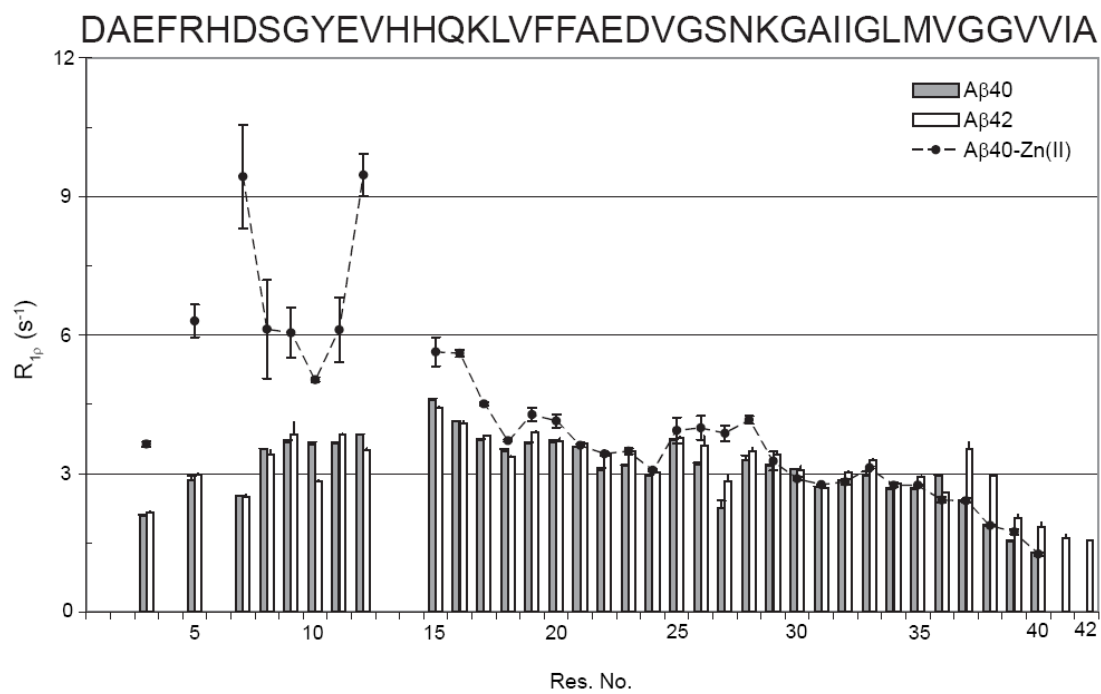

**Fig S2.**  $^{15}\text{N}$   $R_{1\rho}$  relaxation rates for A $\beta$ 40 in the absence or presence of equimolar zinc and A $\beta$ 42.

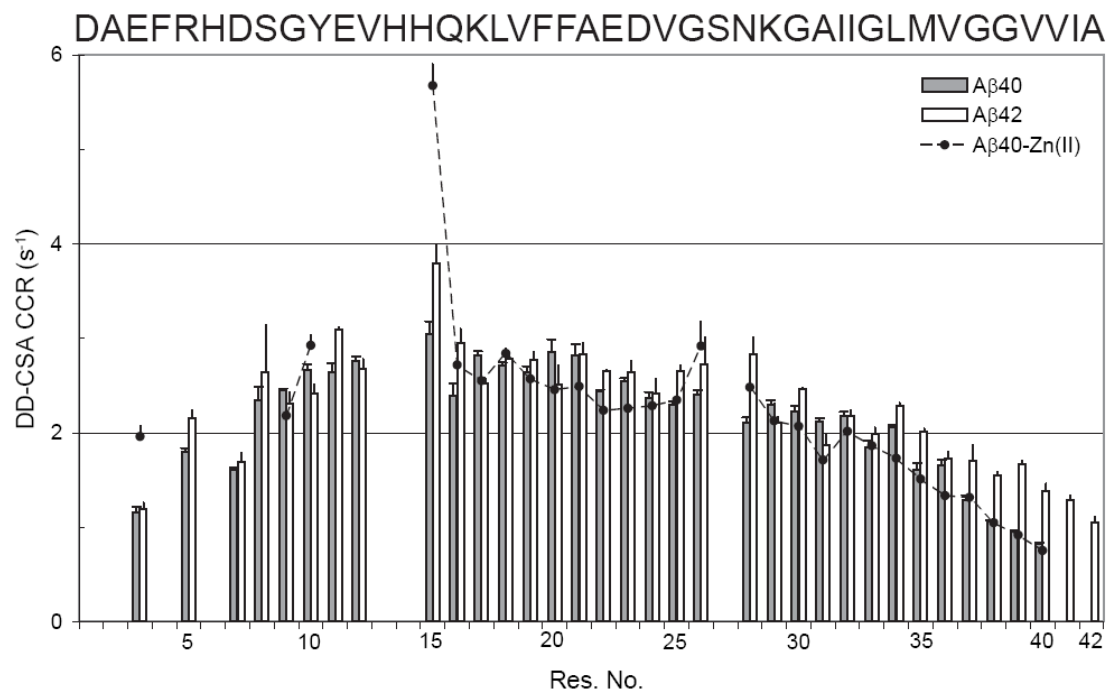

**Fig S3.** Cross-correlated relaxation rates (CCR) between <sup>1</sup>H-<sup>15</sup>N dipole-dipole (DD) and <sup>15</sup>N chemical shift anisotropy (CSA) relaxation mechanisms, measured for Aβ40 in the absence or presence of equimolar zinc and Aβ42.

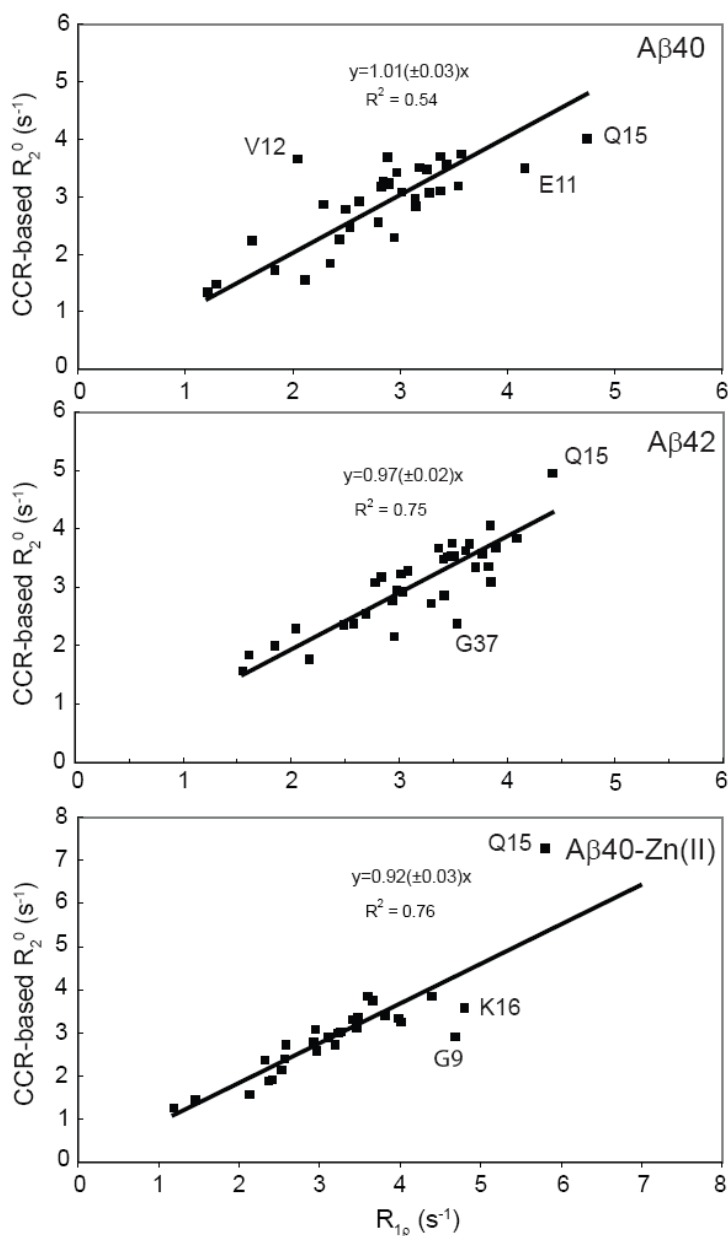

**Fig S4.** Correlation between  $^{15}\text{N}$   $R_{1\rho}$  and cross-correlated relaxation rate (CCR)-based exchange-free transverse relaxation rates, for A $\beta$ 40 in the absence or presence of equimolar zinc and A $\beta$ 42. The slopes less than 1 for zinc-bound A $\beta$ 40 and A $\beta$ 42 reveal that the exchange contribution is not fully eliminated from the  $R_{1\rho}$  data. Some of the peaks with significant deviation from the fitted line have been marked, and they are all located in or close to the binding region.

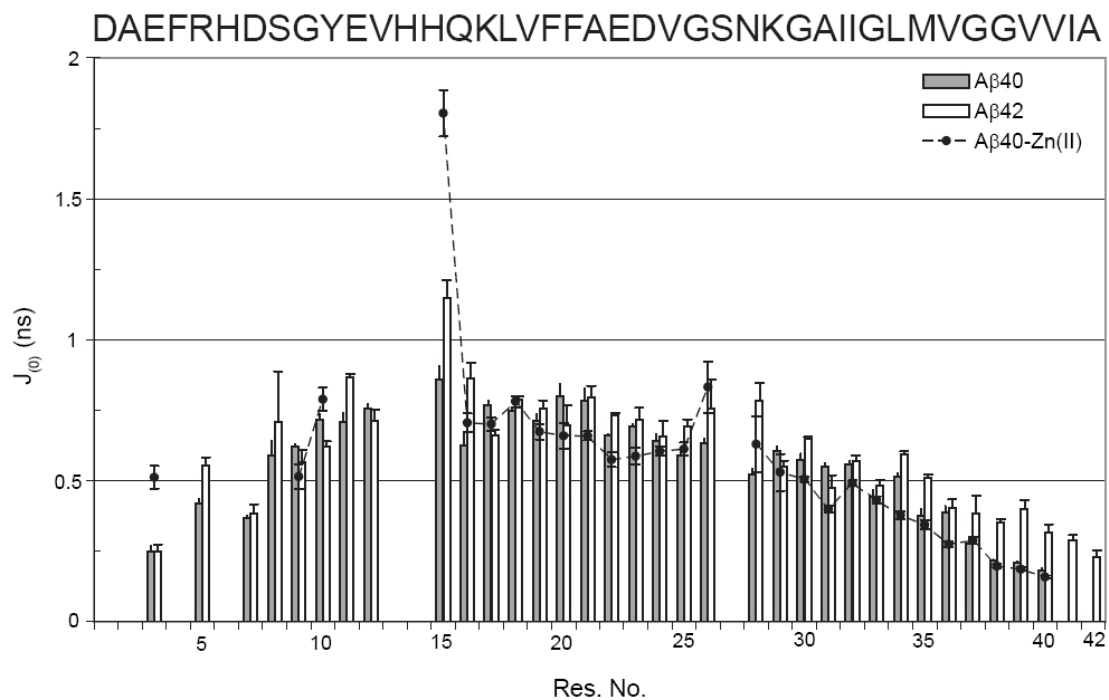

**Fig S5.** Spectral density function at frequency 0,  $J(0)$ , calculated through reduced spectral density mapping using  $^{15}\text{N}$   $R_1$ , CCR-based exchange-free  $R_2$  and  $^1\text{H}$ - $^{15}\text{N}$  heteronuclear NOE values for A $\beta$ 40 in the absence or presence of equimolar zinc and A $\beta$ 42. Larger values of  $J(0)$  indicate higher rigidity on a time scale comparable to the correlation time. Difference values are shown in Fig. 5B.
